# Supplementary material for: Spatial distribution and seasonal variability in atmospheric ammonia measured from ground-based FTIR observations at Hefei, China
Source: Copernicus journal article supplement (doi:10.5194/amt-2020-39), 2020-03-16
Supplement: Supplementary file [file amt-2020-39-AC1-supplement.pdf]

## **Response to comments #1**

We appreciate your constructive and positive comments. The comments and proposed corrections have been taken into account and helped improving the paper. Each comment has been addressed as follows. There is an extensive discussion among the authors regarding how to revise the content. So the response is delayed, and we are sorry for this.

### **Overview:**

Wang et al have submitted a manuscript pertaining to ground based infrared-FTIR measurements of ammonia (NH<sub>3</sub>) at Hefei, China. Two years (Dec 2016 to Nov 2018) of spectral measurements and retrieval processes are detailed, followed with a comparison of the retrieved NH<sub>3</sub> total columns to that of co-located NH<sub>3</sub> column measurement from the satellite-based IASI instruments. Thereafter the ground-based NH<sub>3</sub> columns are used in conjunction with other datasets (in situ carbon monoxide, meteorological data, traffic density) and a back-trajectory modelling study to help attribute NH<sub>3</sub> emissions to specific source types. The authors conclude that agricultural NH<sub>3</sub> emissions are the main source in spring, autumn and winter, and urban anthropogenic emission (vehicles) dominate in summer. Over the two-years of measurements, an increase of 22.14% in NH<sub>3</sub> is reported.

The novelty of this study is that this is the first-time ground based FTIR NH<sub>3</sub> measurements at Hefei are reported and compared to satellite data. The high-quality ground based NH<sub>3</sub> dataset will be a welcome and important addition to international scientific databases. The manuscript is overall logically structured and well referenced. The writing style is fluent and easily understood. Information on data availability is given and there are no registered conflicts of interest.

Improvements can be made to the manuscript. In its current form I do not recommend publication without major revision to address issues concerning the methodology, trend analysis and the source emission attribution (especially sections 3.4 and 3.5).

The manuscript can be seen as comprised of two parts, that describing the ground based NH<sub>3</sub> measurements and satellite comparison, and that of NH<sub>3</sub> source attribution using the NH<sub>3</sub> column measurements, meteorological & air quality datasets, and back trajectory modelling. The first part is within scope of the AMT journal whereas the NH<sub>3</sub> source emission analysis and hypothesis testing in the second part is investigative.

The source emission work is not a simple investigation to support novel measurement validity. To this end, is outside (or bordering on) the scope of AMT. Due to the high level of source attribution investigation and critical issues raised surrounding the analysis of source emission attribution I recommend that this manuscript be either: 1) split into two manuscripts, along the lines of the two parts mentioned previously. The first part submitted to a technical atmospheric journal and the second part

submitted to an atmospheric sciences/chemistry journal, or  
2) submitted to an atmospheric sciences journal with the focus on the source attribution work.

It is my opinion that the work presented in part 1 requires only minor/moderate changes and technical clarification whereas part 2 requires substantial revision to support the interpretation of the findings or a possible reinterpretation of findings. Commentary and questions are listed below, and referenced to the documents: amt-2020-39.pdf and amt-2020-39-supplement.pdf

### **Specific comments:**

S1/ Trend analysis.

It states in the manuscript that there is a 22.14%/yr annual trend in NH<sub>3</sub> (L32, L261, L282, L395, L402-L403). This is calculated from the relative difference between two annual means. I think it is a bit premature to calculate an annual trend based on only 2 data points. The difference could be a step function instead of a trend. I recommend that an annual trend is not reported, but the authors may wish to state the annual means of the two years. It is too speculative at this stage to report a trend, wait for a longer time series.

**Response:** We removed the descriptions about the annual trend throughout the paper, and state the annual means of the two years and the increasing value between the two years.

S2/ Comparison of ground-based and IASI measurements.

L294: “Since the IASI-NH<sub>3</sub> retrieval does not provide averaging kernels and vertical profiles (Van Damme, et al 2014a), this method for comparison is not applied. Here we therefore compare the IASI satellite and FTIR data directly, without considering the effect of different a priori profiles and averaging kernels.”

Such an issue was also confronted by Dammers, et al. 2016., see section 2.3.2. The authors could use the same approach on a subset of the Hefei data, and comment if this alters comparison results. This does assume proxy profiles that are scaled, again see Dammers et al. 2016 for details.

Dammers, E., et al., An evaluation of IASI-NH<sub>3</sub> with ground-based Fourier transform infrared spectroscopy measurements, Atmos. Chem. Phys., 16, 10351–10368, 525 <https://doi.org/10.5194/acp-16-10351-2016>, 2016.

**Response:** We applied the FTIR averaging kernels to IASI profile to account for the effects of the a priori information and vertical sensitivity of the FTIR retrieval, following the method in Dammers et al. (2016), then computed the total column using the smoothed IASI profile. We added the comments if this alter comparison results in section 3.2 “Comparison with satellite data.”

S3/ The descriptive language of correlation coefficients.

There are inconsistencies in the use of descriptive language used in commentary of correlation coefficients. In the two sentences below, correlations of 0.47 and 0.48 are described as both ‘weak’ and ‘high’.

L345: “NH3 columns show weak correlation (R=0.47) with PM2.5 concentrations”

L359: “Further, the scatter plot of NH3 columns with air temperature in spring and autumn season displays relatively high correlation, with correlation coefficients of 0.53 and 0.48”.

Furthermore, at L417: “there was a clear correlation between NH3 columns and air temperature in spring and autumn over Hefei, with correlation coefficients of 0.53 and 0.48, respectively.”

I recommend that a standard way of describing the correlations be adopted to achieve consistency. For instance, below is a table from Schober, et al.

| Table. Example of a Conventional Approach to Interpreting a Correlation Coefficient |                         |
|-------------------------------------------------------------------------------------|-------------------------|
| Absolute Magnitude of the Observed Correlation Coefficient                          | Interpretation          |
| 0.00–0.10                                                                           | Negligible correlation  |
| 0.10–0.39                                                                           | Weak correlation        |
| 0.40–0.69                                                                           | Moderate correlation    |
| 0.70–0.89                                                                           | Strong correlation      |
| 0.90–1.00                                                                           | Very strong correlation |

Schober, Patrick, Christa Boer, and Lothar A. Schwarte. "Correlation coefficients: appropriate use and interpretation." *Anesthesia & Analgesia* 126.5 (2018): 1763-1768. Using this example, all the correlations mentioned above would be described as moderate.

**Response: we modified the descriptive language of correlation coefficients throughout the paper, according to the way of describing the correlations in Schober et al.(2018).**

S4/ Calculation of correlation coefficients.

Could the authors also state the method used to calculate the correlation coefficients, most importantly did the method use uncertainty estimates in both the abscissa and ordinate data points, as both can have large uncertainties.

**Response: We added the description about the the method used to calculate the correlation coefficients, and used uncertainty estimates in both the abscissa and ordinate data points in the third paragraph in section 3.2 “Comparison with satellite data”.**

S5/ NH3 Air temperature correlation.

L352: “High correlation of NH3 columns with air temperature is obvious from their diurnal variation during the observation period, as seen in Figure 8.”

From figure 8, I could not see a ‘high’ correlation. The calculated correlation coefficient is also not given. I read data values from figure 8 (and assuming no uncertainty in the read values), then made a scatter plot and calculated the correlation coefficient. See the figure below. I calculated  $R^2 \approx 0.08$ .

This dataset is imprecise and just an indicator. Could the authors please provide the correlation coefficient from the proper dataset and remark if they think the correlation is high. If not, how does this affect the conclusions the authors have made. In my opinion, fig 8 shows a negligible correlation between NH3 and temperature over the analysed averaged time period. There are two spikes in NH3, in the mid-morning and

mid-afternoon. Does this correlate with traffic volumes or traffic patterns?

**Response:** We calculated the correlation coefficient between NH<sub>3</sub> columns with air temperature from their diurnal variation, and the correlation coefficient is 0.39, showing a weak correlation between NH<sub>3</sub> and temperature from their diurnal variation. The NH<sub>3</sub> data measured after 14:00 PM local time are sparse as we collect the MIR and NIR solar spectra alternately every day, so the data in some time period lacks of representation for diurnal variation analysis. Therefore we removed the discussion about the correlation of NH<sub>3</sub> columns with air temperature from their diurnal variation, including Figure 8, in section 3.3 “Identification of emission sources of NH<sub>3</sub>”.

I think the two spikes in NH<sub>3</sub> columns in the mid-morning and mid-afternoon, is not correlated with traffic patterns, as they should occur on 7:00-9:00 AM and 17:00-19:00 PM if they are correlated with traffic patterns.

Lastly figure 9 should also include the winter and summer correlation plots, like that for spring and autumn.

**Response:** We added the the winter and summer correlation plots in Figure 9.

S6/ Section 3.4 and 3.5: NH<sub>3</sub> and CO industrial emissions.

Industrial ammonia:

Throughout the manuscript there is a lack of detail and discussion on possible industrial (point source) emissions of NH<sub>3</sub> (such as in Wang, et al, 2015). In section 3.4 analysis only concerns NH<sub>3</sub> from vehicle sources. Section 3.5 talks about agricultural emissions (transported into the Hefei region) with a passing mention of “urban anthropogenic emissions” (L388). The only specific mention of point sources is in figure 1. Two large NH<sub>3</sub> point sources are identified based on Table A1 of Clarisse et al. 2019.

Clarisse, L., Van Damme, M., Clerbaux, C., and Coheur, P.-F.: Tracking down global NH<sub>3</sub> point sources with wind-adjusted superresolution, *Atmos. Meas. Tech.*, 12, 5457–5473, <https://doi.org/10.5194/amt-12-5457-2019>, 2019.

Wang, S., Nan, J., Shi, C., Fu, Q., Gao, S., Wang, D., Cui, H., Saiz-Lopez, A., and Zhou, B.: Atmospheric ammonia and its impacts on regional air quality over the megacity of Shanghai, China, *Sci. Rep.*, 5, 15842, <https://doi.org/10.1038/srep15842>, 2015.

Industrial CO emissions:

L329 “To examine the contribution of traffic to NH<sub>3</sub> columns, we analyze the relationship of NH<sub>3</sub> columns with CO surface concentrations” and L342 “Atmospheric CO is regarded as a primary pollutant mainly emitted from vehicles in urban areas, and there is no significant biomass burning source around the Hefei site, thus the elevated NH<sub>3</sub> columns are likely partly caused by urban emissions from vehicles.”. Again, this is a lack of detail on CO industrial (point source) emissions and the effect this would have on any NH<sub>3</sub>-CO correlations. For example, there is a 700MW coal-fired power station ([https://www.gem.wiki/Hefei-2\\_power\\_station](https://www.gem.wiki/Hefei-2_power_station)) to the east of Hefei (~8km), the red flag in the image below, and two power stations in the Hefei region identified in Tan, et al. 2019.

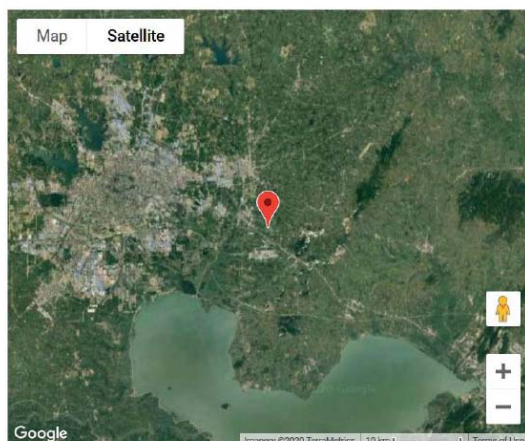

Without detailed analysis that includes probable/possible industrial sources of NH<sub>3</sub> and CO, conclusions drawn in sections 3.4 and 3.5 are highly speculative and qualitative (using vague phrases such as “likely partly” (L344)).

Tan, W., Zhao, S., Liu, C., Chan, K., L., Xie, Z., Zhu, Y., Su, W., Zhang, C., Liu, H., Xing, C., and Liu, J., Estimation of winter time NO<sub>x</sub> emissions in Hefei, a typical inland city of China, using mobile MAXDOAS observations, *Atmos. Environ.*, 200, 228-242, <https://doi.org/10.1016/j.atmosenv.2018.12.009>, 2019.

**Response:** We added the discussion of possible industrial (point source) emissions of NH<sub>3</sub> and CO, including two power plants in Hefei, and two large NH<sub>3</sub> point sources identified by Clarisse et al. (2019), explaining the effect of industrial (point source) emissions on any NH<sub>3</sub>-CO correlation in Section 3.3 “Identification of emission sources of NH<sub>3</sub>”.

S7/ Traffic pollutant correlations.

L336: “The results show that there exists no correlation between NH<sub>3</sub> columns and concentrations of NO<sub>2</sub>, SO<sub>2</sub>, PM<sub>10</sub> and the value of AQI over the four seasons (not shown).” Mathematically, there is always a correlation coefficient, if the correlation is less than 0.1, maybe better to state correlation is negligible. Even better, would be to list the correlation coefficient value after each species, i.e. NO<sub>2</sub> (XX), SO<sub>2</sub> (XX) etc...

It is interesting to read that there is no (negligible) correlation with NO<sub>2</sub>. NO<sub>x</sub> (NO<sub>2</sub> + NO) is a primary pollutant from vehicle emissions (Zhou et al., 2014, Phillips et al, 2019). What does a NH<sub>3</sub>-CO moderate correlation with a negligible NH<sub>3</sub>-NO<sub>2</sub> correlation indicate? Could the authors please comment on the reported NH<sub>3</sub>-NO<sub>2</sub> correlation.

Zhou, Rui, et al. "Study on the traffic air pollution inside and outside a road tunnel in Shanghai, China." *PloS one* 9.11 (2014).

Phillips, F. A., et al.: Vehicle ammonia emissions measured in an urban environment in Sydney, Australia, using open path Fourier Transform Infra-Red Spectroscopy. *Atmosphere*, 10, 208, <https://doi.org/10.3390/atmos10040208>, 645 2019.

**Response:** We discuss the correlation of NH<sub>3</sub> with CO and NO<sub>2</sub> to find whether traffic

contributes to NH<sub>3</sub> emissions, so it is not important to discuss the relationships of NH<sub>3</sub> with SO<sub>2</sub>, PM<sub>10</sub> and AQI. Therefore we removed the description of the correlation between NH<sub>3</sub> columns and concentrations of SO<sub>2</sub>, PM<sub>10</sub> and the AQI over the four seasons. We added the specific correlation coefficient between NH<sub>3</sub> and NO<sub>2</sub>, and the description about what the NH<sub>3</sub>-CO moderate correlation with a negligible NH<sub>3</sub>-NO<sub>2</sub> correlation indicates, in Section 3.3 “Identification of emission sources of NH<sub>3</sub>”.

There is also no quantitative measurand of traffic volumes. If NH<sub>3</sub> emissions were primarily (or even partly) from vehicle emissions, then more in-depth quantitative analysis is required.

**Response:** Sorry we have not monitored the traffic volumes during the measurement, so we didn't use the value to quantitatively analyze the vehicle emissions.

S8/ NH<sub>3</sub> and PM<sub>2.5</sub>.

L345: “Meanwhile, NH<sub>3</sub> columns show weak correlation (R=0.47) with PM<sub>2.5</sub> concentrations (Fig.7(b)), meaning that NH<sub>3</sub> contributed to the formation of fine particulates significantly in summer.”. This qualitative statement needs expanding. More in-depth analysis of the Hefei dataset is needed. A more quantitative investigation is required into PM<sub>2.5</sub> and NH<sub>3</sub> correlation and/or causation. It is well known NH<sub>3</sub> contributes to PM<sub>2.5</sub>.

**Response:** Sorry the concentrations of ammonium( NH<sub>4</sub><sup>+</sup> ) and sulfate-nitrate-ammonium(SNA) aerosols near our Hefei site are not available, and the purpose of the section is to find the possible emission sources of NH<sub>3</sub>, so we removed the description about the relationship of NH<sub>3</sub> and PM<sub>2.5</sub> in the paper.

S9/ Column to point correlations

The NH<sub>3</sub> measurements are partial columns extending from ~0-4km in altitude. The meteorological and air quality datasets are from point source ground level measurements, located a distance from the NH<sub>3</sub> measurements. These two datasets will have quite different footprints. The in-situ ground based measurements will have a more localised footprint, whereas the column measurements will have a larger regional footprint. Could the authors comment on this fact and how it affects correlation interpretation.

**Response:** We added the comment on how the column with point correlations affects the correlation coefficient in section 3.3 “Identification of emission sources of NH<sub>3</sub>”.

S10/ Agricultural NH<sub>3</sub> emissions

L362 – 367: “In Hefei, the cropland in spring is characterized by the growing season of wheat and early rice, and synthetic fertilizer is applied during this period. The fertilizer application also tends to occur in autumn, when winter wheat is sowed, and a second rice crop is growing. The agricultural practice may explain the correlation between NH<sub>3</sub> columns and temperature over Hefei over these two seasons, which suggests that agriculture was the main source of ammonia in spring and autumn.”

This a good starting hypothesis to investigate, but it is left as a conjecture. Too vague language is used, e.g. “May explain” and “suggests”. These are good starting points, but quantitative substantial evidence is required. This is lacking. Seasonal (hence temperature) correlations is not a strong causal link without additional collaborating evidence. The authors need to add such evidence to prove the statement in the manuscript.

**Response:** We added some descriptions from other publications to support our conclusions. However, quantification of NH<sub>3</sub> emissions from different sources in four seasons in Hefei is very difficult for us, as the High-resolution inventory of ammonia emissions in 2017 and 2018 in Hefei is not available, so we have no further quantitative data to prove the emission sources in four seasons.

S11/ Windrose

In such wind rose polar plots the wind strength is usually plotted as the radial component and the NH<sub>3</sub> abundance as coloured points. I would strongly recommend replotting with wind speed as the radial axis of the polar plot and NH<sub>3</sub> concentrations as coloured dots. Looking at the current plots, the greatest wind speed is less than 4.5ms<sup>-1</sup>. This is classified as a gentle breeze using the Beaufort scale. This indicates that the majority of measured NH<sub>3</sub> is from local sources (assuming hourly- low daily NH<sub>3</sub> lifetimes). The highest concentrations of NH<sub>3</sub> is measured during easterly winds, the direction of the main Hefei urban area and the lowest concentrations from the west, a less populated and dense area. At L368 the authors comment on the wind rose data, but do not use it to help attribute the urban emission sources (traffic vs industrial). High NH<sub>3</sub> concentration points are in the NW quadrant, the direction of an NH<sub>3</sub> point source shown in figure 1. There is no commentary on this fact.

**Response:** We replotted Figure 10, with wind speed as the radial axis of the polar plot and NH<sub>3</sub> concentrations as colored dots. And we added comments on the wind rose data, using it to help attribute the urban emission sources, in section 3.3 “Identification of emission sources of NH<sub>3</sub>”.

S12/ NH<sub>3</sub> lifetime.

There is only passing mention of NH<sub>3</sub> lifetime (L55). Is there an expected difference in NH<sub>3</sub> lifetime depending on emission source (i.e. rural vs industrial) and would this influence NH<sub>3</sub> source attribution?

**Response:** NH<sub>3</sub> lifetime depends on other pollutants (reaction with ammonia), meteorological variables (water vapor, clouds and temperature), winds (atmospheric mixing and recirculation) and the NH<sub>3</sub> column itself. We read some publications, but didn't find there is difference in NH<sub>3</sub> lifetime depending on emission source (i.e. rural vs industrial).

S13/ Back-trajectory calculations using HYSPLIT.

At L380 the authors introduce a new method to help assess NH<sub>3</sub> source emissions. Back trajectory modelling is introduced, but I cannot understand why the bulk of the findings are relegated to the supplement. I recommend that the supplement content and the main



manuscript from L380 -390 be concatenated into a new section, e.g. section 3.6. In addition, a much more detailed explanation of the model set up (meteorological fields, resolution, cluster analysis details, etc) and analysis (source attribution) needs to be undertaken. Example: the PSCF's in figure S2 are hard to see in detail and require further inquiry. The interpretation of the results at L386-390, and the supplement, need more rigorous assessment in a scale more regional to Hefei (due to low wind speeds). There is no mention of carbon monoxide transport either, and the effect this would have on NH<sub>3</sub>-CO correlations and source attribution.

**Response:** We moved the supplement content to a new section 3.4. We added explanation of the model set up and analysis in a scale more regional to Hefei. We also plotted the PSCF of CO concentrations over Hefei from 2017 to 2018 in four seasons. But it seems difficult to use it to explain the NH<sub>3</sub>-CO correlations and source attribution.

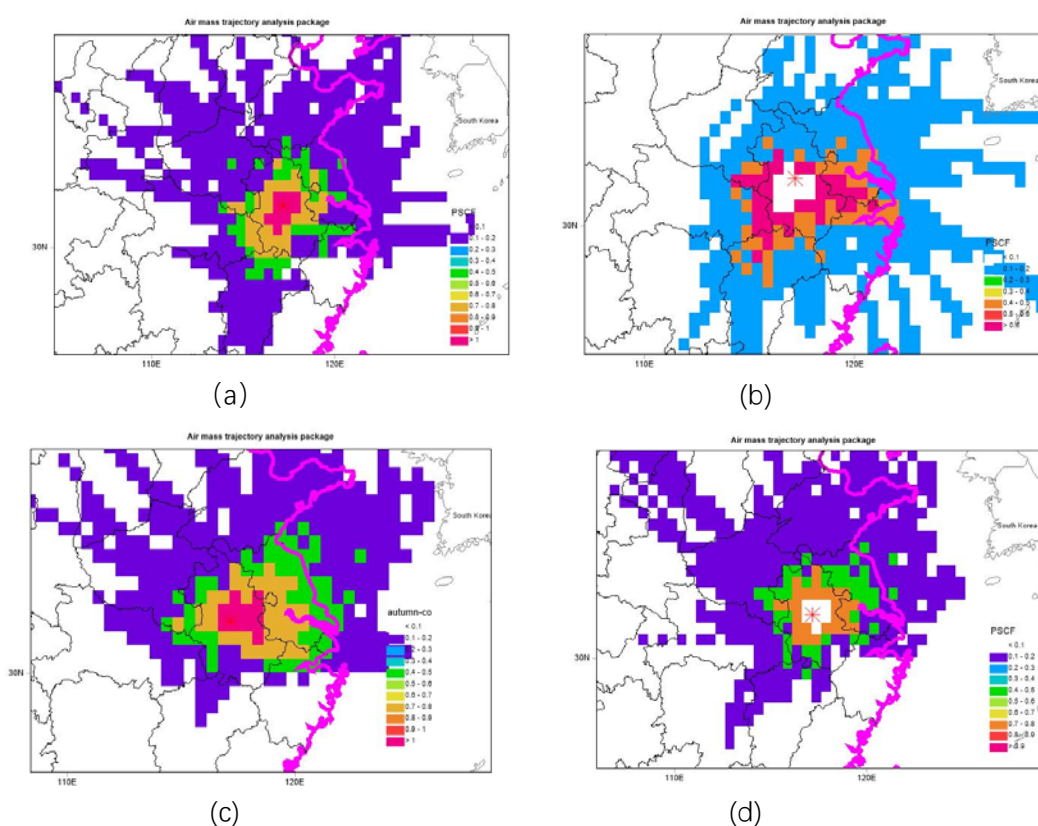

S14/ Concluding statements in section 4.

This section requires major revision based upon the issues raised in this review. Currently there is not enough collaborating evidence in the manuscript to explicitly state with certainty the origin and abundance of NH<sub>3</sub> emissions measured at Hefei.

**Response:** We revised the concluding statements in section 4 based on the revision above.

**Minor/Technical:**

M1/ L30: “emission sources and potential sources”. What is the difference between



emission and potential sources? Do you mean known emission sources and unknown emission sources? Can you please make this clearer and correct through-out the manuscript?

**Response:** We corrected the statement throughout the manuscript.

M2/ L34: “The results demonstrate the IASI data are in broad agreement with our FTIR data.”. I think it best to rephrase as “The results demonstrate that the IASI and FTIR data, over Hefei, are in broad agreement.”.

**Response:** We corrected this sentence.

M3/ L64: “This is mainly caused by lack of representative measurements of atmospheric NH<sub>3</sub>.”. Could a reference to this statement be added?

**Response:** We added a reference here.

M4/ NH<sub>4</sub><sup>+</sup>: There is no mention of NH<sub>4</sub><sup>+</sup> with respect to NH<sub>3</sub> partition equilibrium in NH<sub>x</sub>, and how this will affect the measured NH<sub>3</sub> abundances. Could the authors please comment on this aspect.

Lachatre, et al, 2019 would be a good starting point.

**Response:** We added the comment about NH<sub>4</sub><sup>+</sup> with respect to NH<sub>3</sub> partition equilibrium in 3.1 “Time series and seasonal trend of NH<sub>3</sub>”.

M5/ L68: There are ~12 references to a single statement. Can this be cut down to only the essential references needed. Passive sampling is not the focus of this manuscript.

**Response:** We removed 7 references and kept 5 essential references needed.

M6/ L71: Pedantic but...could ‘Sticky’ be replaced with a more scientific descriptive term, or place in quotation i.e. ‘sticky’.

**Response:** We replaced ‘Sticky’ with ‘and easy to adsorb onto surfaces’.

M7/ L78: Replace ‘ground-based’ with ‘ground level’

**Response:** We replaced ‘ground-based’ with ‘ground level’.

M8/ L120: “Furthermore, ground based observations of NH<sub>3</sub> have been sparse throughout China (Liu et al., 2011; Xu et al., 2015).” Ground based or ground level in situ?

**Response:** We added ‘ground level in situ’ in the sentence.

M9/ L132: Replace “reduces” with “reductions of”

**Response:** We replaced “reduces” with “reductions of”

M10/ L145: I think “Materials” is the incorrect word, maybe “Measurements” would be better.

**Response:** We replaced “Materials” with “Measurements”.

M11/ L164: “liquid-nitrogen-cooled MCT/InSb detector”. Just to clarify, is this a single detector or dual HgCT and InSb detectors?

**Response:** We replaced “liquid-nitrogen-cooled MCT/InSb detector” with “liquid-nitrogen-cooled MCT and InSb detector”.

M12/ L165: Replace ‘suit’ with ‘suite’

**Response:** We replaced ‘suit’ with ‘suite’.

M13/ L171: “At the same time, the indoor pressure, temperature and relative humidity are logge continuously.”. Are these important parameters for the FTIR measurements?

**Response:** We removed this sentence.

M14/ L173: “similar to the NH<sub>3</sub> retrieval strategies in Dammers et al. (2015)”. What are the differences? Are the Microwindows the same?

**Response:** We replaced “similar to the NH<sub>3</sub> retrieval strategies in Dammers et al. (2015)” with “same as the NH<sub>3</sub> retrieval microwindows adopted by Réunion and Jungfraujoch sites in Dammers et al. (2015)”.

M15/ L181: “A priori profiles of NH<sub>3</sub> and interfering gases are taken from the Whole Atmosphere Community Climate Model (WACCM, v.6\_120\_99) in combination with initial measurement values.” There is no NH<sub>3</sub> modelling output from WACCMv6. Could the authors please correctly reference the NH<sub>3</sub> apriori source used. Is a static apriori used? Or does it change throughout the retrieval time series?

**Response:** We correctly referenced the NH<sub>3</sub> a priori source used. It is a static a priori profile used.

M16/ L181: “...in combination with initial measurement values.”. Sorry, I do not understand this. Can you please explain what initial measurements are, and how they are combined with (so-called) WACCMv6 profiles to obtain an apriori?

**Response:** We replaced “...in combination with initial measurement values.” with “A priori profile of NH<sub>3</sub> is taken from the one adopted in Dammers et al. (2015), which is based on the average Bremen NH<sub>3</sub> concentration, and then adjusted to match the local surface concentrations measured in our site.”

M17/ L182: “WACCM, v.6\_120\_99”. I think this can be referenced better. ‘\_120\_99’ is not part of the WACCM simulation identify code. Maybe better to reference it this way: (WACCMv6, Garcia et al. 2007).

Garcia, R. R., Marsh, D. R., Kinnison, D. E., Boville, B. A., and Sassi, F.: Simulation of secular trends in the middle atmosphere, 1950-2003, 20 J. Geophys. Res., 112, D09301, doi:10.1029/2006JD007485, 2007.

**Response:** We referenced the WACCM as (WACCMv6, Garcia et al. 2007).

M18/ L183: “for ammonia was constructed to be diagonal, with standard deviations of 100% for all layers.” What was the basis for assuming an uncertainty of 100% and is there any inter-layer covariance/correlation constraint?

**Response:** We added the basis for assuming an uncertainty of 100% and there is a Gaussian interlayer correlation with HWHM of 4 km after check the input file of retrieval.

M19/ I would also encourage the authors to include another sentence (or two) after the description of the apriori profile and uncertainties describing other state vector retrieval parameters such as phase fitting, instrument line shape, continuum fit, zero level offset etc.

**Response:** We added the description about the other state vector retrieval parameters, such as phase, instrument line shape, continuum fit, zero level offset.

M20/ Also...could be authors also state the SNR (or Se) of the measurements, and either if the SNR is held static or varies on a spectrum by spectrum basis.

**Response:** We stated the SNR of the measurements, and we set the SNR to be 200 for each spectrum.

M21/ How is the H<sub>2</sub>O apriori set? For instance, is it from NCEP daily profiles, or from WACCM, or from a previous H<sub>2</sub>O retrieval?

**Response:** The water profiles are derived from NCEP reanalysis daily mean specific humidity profiles.

M22/ L190: “about 0.498 % and 0.505%”, could these values be rounded to the correct number of significant figures.

**Response:** We round them to the correct number.

M23/ Fig 2 and L188: “The measured spectrum is shown in blue, the fitted spectrum in red and the residual in black”. There are two blue lines, ‘observed’ and H<sub>2</sub>O. Either state as ‘dark blue’ or switch colour.

**Response:** We replotted the Figure 2.

M24/ I recommend that section 3.1.2 lines L238 to 246 be moved to the end of section 2.2. This is because it details retrieval information content and logically comes after spectral fitting.

**Response:** We moved the contents about lines L238 to 246 to the end of section 2.2.

M25/ L239: “It is evident that the retrieval is most sensitive to the troposphere, where the concentration of ammonia peaks.” Add in ‘lower’: “It is evident that the retrieval is most sensitive in the lower troposphere, where the concentration of ammonia peaks”

**Response:** We corrected the sentence.

M26/ L243: “The degrees of freedom for signal (DOFS) value is 1.10 given by this measurement”. Can the authors indicate at what height, from the surface up, does the DOFS reach 1.0, essentially showing the partial column range in which there is a signal?

**Response: DOFS reach 1.0 at about 3.2 km from the surface up. We stated it.**

M27/ Fig 4. The individual layer averaging kernels are all the same colour, very confusing. Maybe only plot for layers 0-10km. There are also no units for the VMR averaging kernels (I assume VMR/VMR)? Also, for the total column averaging kernel, what are the units?

**Response: We replotted Fig 4, now is Fig 3, according to the suggestions.**

M28/ Section 3.1.1 could be transferred to be section 2.3. (IASI becomes section 2.4). It makes more sense that the entire retrieval process from retrieval set up to retrieval output then error analysis is all together in one section.

**Response: We transferred Section 3.1.1 to be section 2.3, and “IASI data” becomes section 2.4.**

M29/ L215: “The error calculation is based on attributing uncertainties to all parameters used in the profile retrieval”. Maybe better stated as “The error calculation is based on attributing uncertainties to all parameters in the retrieval state vector”.

**Response: We corrected this sentence.**

M30/ L221: “Table 1 lists the uncertainties of the parameters assumed in the retrievals.” Maybe better stated as: “Table 1 lists the uncertainties of the retrieval state vector parameters.”

**Response: We corrected this sentence.**

M31/ L222: “The total errors are about 11.42 % based on the combination of random and systematic errors”. Is error analysis applied to each individual retrieval? If so, the mean total error and 1-sigma standard deviation of the time series could be given. This would be a better indication of the overall timeseries uncertainty than a single retrieval.

**Response: We gave the the mean total error and 1-sigma standard deviation of the time series here.**

M32/ Table 1:

Could the authors please state where or how the temperature profile uncertainties were set/calculated. Did the authors calculate the uncertainty associated with inferring species spectral uncertainties? i.e. the line intensity (and pressure and temperature broadening) uncertainties in CO<sub>2</sub>, H<sub>2</sub>O etc...

Could ‘NH<sub>3</sub>’ be put in front of Line Intensity, and P, T broadening (broadening, not broadening). Could the authors also reference the origin of the 10% spectral uncertainties.

Response: We redid error calculations considering the line intensity (and pressure and temperature broadening) uncertainties in interfering gases, such as CO<sub>2</sub>, H<sub>2</sub>O, and O<sub>3</sub>. We changed the 10% of spectral uncertainties of NH<sub>3</sub> to 20%, according to the value in HITRAN 2012 database.

M33/ Section 3.1.2 and Fig 3: With Section 3.1.1 moved to section 2, along with the second half of section 3.1.2, this leaves a single paragraph (L230-237) in section 3.1.2. This paragraph could be moved into section 3.2. There is very little vertical information due to the low DOFs, basically profile scaling.

Response: We moved the second half of section 3.1.2 to section 3.2.

Figure 3 offers little information due to the low DOFs. The variation within a season is not presented so it is hard to conclude if the seasonal differences in profile are significant. Maybe reconstruct figure 3 to have 4 plots (2 by 2), one for each season and for each season include the spread (1-sigma SD?) at each level.

Response: We replotted Fig. 3 (now Fig. 4) to have 4 plots (2 by 2) and include the spread (1-sigma SD) at each level.

M34/ L235: “The seasonal averaged surface level of NH<sub>3</sub> decreased from 10.82 ppb in summer to 2.92 ppb in winter during 2017 and 2018, and the corresponding values are about 5.48 and 6.04 ppb in spring and autumn, respectively.” It would be advantageous if for each season the mean and spread (1-sigma SD) was given.

Response: We gave the the mean and spread (1-sigma SD) of surface concentration for each season.

M35/ L250: “Many spectra ranging from 700 to 1350 cm<sup>-1</sup> are saturated in summer (due to high humidity), causing the retrieved NH<sub>3</sub> data to be sparsely sampled relative to those in other seasons”. MW1 (~929.6-931.2cm<sup>-1</sup>) (fig 2a) shows small H<sub>2</sub>O absorption features, as opposed to MW2. In summertime, could plausible retrievals be performed with only using MW1 without altering the DOFS too much? This may help increase the number of observations.

Response: We tested this method only using MW1, but this changed the results slightly.

M36/ L276: “It follows therefore that seasonal variation of NH<sub>3</sub> columns in the Hefei area accords with that in other areas in China, with the main emission source being agriculture.” This sentence is not needed as a near repeat of the statement at L263.

Response: We removed this sentence.

M37/ L287: Maybe rewritten as “Here we present a comparison of the ground-based NH<sub>3</sub> column measurements with the IASI satellite measurements”.

Response: We rewritten this sentence.

M38/ L290. How was the co-location criteria of 0.5 degrees and 90 minutes decided

upon?

**Response:** We gave the reason why set the co-location criteria.

M39/ L303: “The Relative differences larger than 100% were considered as outliers from the data”. On what basis, and why the value of 100%? Was the ground based or satellite measurements anomalous?

**Response:** We found that the satellite measurements with large retrieval errors when the relative differences is larger than 100%.

M40/ L305: “with standard deviation of 44.44% and 41.00%, respectively.”. Maybe 44% and 41%.

**Response:** We corrected the two values. The IASI team provided the new version of IASI data. We compared the IASI data of new version with our FTIR data, so the comparison results are slightly different with the previous ones.

M41/ L308: “Additionally, the distributions of the relative difference of the two dataset show that, the relative bias mainly range from -60% to 80% for IASI A data, from -60% to 60% for IASI B data, and the bias from -20% to 0% as well as -40% to -20% has the highest frequency in both respective bins (Figure 6 (c) and (d)).” Bias refers to the overall difference between the two datasets, so I think it is better worded as: “Additionally, the distributions of the relative difference of the two datasets show that the relative differences of a measurement pair, mainly range from -60% to 80% for IASI A data, from -60% to 60% for IASI B data as seen in figure 6 (c) and (d).”

**Response:** We corrected this sentence.

M42/ L313L First time the acronym NDACC is used. For the first instance can the full title please be used. Also maybe better stated as: “nine NDACC FTIR stations”.

**Response:** We gave the full title of NDACC and corrected this statement.

M43/ L317: “The correlation coefficient (R) between the CrIS NH<sub>3</sub> total columns and FTIR data was 0.77, and the relative difference is 0-5 % with a standard deviation of 25–50 % for comparison of high levels of NH<sub>3</sub>.” Sorry I do not understand the ‘0-5%’ statement, can you please explain it more clearly, how can you have multiple mean differences?

**Response:** We explained this sentence more clearly.

M44/ L320: “results from other NDACC site data”. Is Hefei a NDACC affiliated FTIR site? If not, then the current wording can be read that it is. Maybe replace with “comparison results in the aforementioned literature”

**Response:** We corrected this sentence.

M45/ L330: “The Dongpu Reservoir air quality monitoring station (31.91°N, 117.16°E) is very close to our site, part of a National Ambient Air Quality Monitoring Network, which monitors and routinely publishes the concentrations of main gaseous



pollutants, including CO, NO<sub>2</sub>, PM<sub>2.5</sub>, PM<sub>10</sub>, SO<sub>2</sub>, O<sub>3</sub> and Air Quality Index (AQI) etc”. Could the distance from the air quality station to the FTIR site please be stated and a reference added pertaining to the National Ambient Air Quality Monitoring Network, (esp. for the Hefei site if possible). Could the Dongpu site please be marked in figure 1b.

**Response:** We stated the distance from the air quality station, and added a reference about the National Ambient Air Quality Monitoring Network. We also marked the the Dongpu site in Fig. 1b.

M46/ L376: “Overall, the results indicate that air temperature, wind direction and wind speed are the main factors that influence gaseous NH<sub>3</sub> concentrations in Hefei.”. What about source emissions?

**Response:** We corrected this sentence as “Overall, the results indicate that air temperature, wind direction and wind speed in addition to source emissions are the main factors that influence gaseous NH<sub>3</sub> concentrations in Hefei.”.

M47/ L393: the adjective ‘great’ can be omitted.

**Response:** We removed this word.

M48/ L415: replace “meteorological parameters” with “meteorological conditions”.

**Response:** We replaced this word in this sentence.

M49/ L432: “This is the first time that ground-based FTIR remote sensing of NH<sub>3</sub> columns and comparison with satellite data are reported in China”. A valid and important finding and should be reported at the start of the conclusion section.

**Response:** We moved this sentence to the end of the first paragraph in section 4 “Conclusions”.

M50/ L405: “To validate the satellite observations...”. In this case since the satellite measurements have been compared against other measurements favourably, the satellite measurements are used to confirm/validate the Hefei site ground base measurements.

**Response:** We rewrote the sentence “Since the IASI satellite measurements have been compared and validated by other measurements, the IASI satellite data were used to confirm the ground-based measurements at Hefei site.”.

M51/ Fig 1: Could longitude and latitude units please be put on both axis. The area displayed could also be reduced to focus on the eastern and middle region of China. In map B, could the Dongpu AQ station also be identified. Could the location identifier ‘dots’ also be bigger in both maps. Could a distance scale also be put on the map? Caption: “The regional distributions of NH<sub>3</sub> columns (molec cm<sup>-2</sup>) from 2008-2018 IASI-A and 2013-2018 IASI-B morning overpasses of ANNI-NH<sub>3</sub>-v3R data”. Are these annual mean columns? Good idea to specify the temporal period.

Response: We replotted Fig 1 following the suggestions.

M52/ Fig 2a and b: the title consists of RMS. If possible, add in the DOFS and  $\text{CHI}^2$  fit variables as well for completeness.

Response: We added DOFS and  $\text{CHI}^2$  in the caption of Fig 2.

M53/ Fig 5: Could 1-sigma standard deviation spread/error bars be put on the daily averages.

Response: We replotted Fig 5, with 1-sigma standard deviation.

M54/ Fig 6: A lot of white space in plots A & B, could the X-axis range be shortened,  $\text{MAX X} \approx 8 \times 10^{16}$ .

Response: We didn't shorten the X-axis range, as we want to plot the line  $y=x$ , which need the X-axis range is same with the Y-axis one.

M55/ Fig 7: Could the uncertainty bars be added for each point, like that in fig 6 a and b. Caption: "Scatter plot of  $\text{NH}_3$  columns (molec  $\text{cm}^{-2}$ ) with CO (mg  $\text{m}^{-3}$ , a) and  $\text{PM}_{2.5}$  ( $\mu\text{g m}^{-3}$ , b) concentrations measured at the Dongpu Reservoir air quality monitoring site in summer." Are these daily averages? Please add in temporal period.

Response: We replotted Fig. 7, with 1-sigma standard deviation for CO.

M56/ Fig 9: Caption: "Scatter plot of  $\text{NH}_3$  column (molec  $\text{cm}^{-2}$ ) with air temperature ( $^{\circ}\text{C}$ ) in spring (a) and autumn (b)." Again, please add temporal period (hourly, daily, monthly...).

Response: We added "individual  $\text{NH}_3$  column" here.

M57/ Fig S1 and S2, it is hard to ascertain information from both plots. As a first step, could the map lat/lon boundaries be reduced to concentrate on areas of interest better. I.e. zoomed in a bit.

Response: We replotted Fig S1 and S2 (now Fig 11 and 12).

M58/

Franco, B. Clarisse, L., Stavrou, T., Müller, J.-F., Van Damme, M., Whitburn, S., Hadji-Lazarou, J., Hurtmans, D., Taraborrelli, D., Clerbaux, C., Coheur, P.-F.: A General Framework for Global Retrievals of Trace Gases From IASI: Application to Methanol, Formic Acid, and PAN, J. Geophys. Res.-Atmos., 123, 963-984, <https://doi.org/10.1029/2018JD029633>, 2018.

Is this reference relevant?

Response: We kept this reference as we think it is relevant to the retrieval methods about IASI data.
